# Supplementary material for: Empirical Antibiotic Therapy for Gram-Negative Bacilli Ventilator-Associated Pneumonia: Observational Study and Pharmacodynamic Assessment
Source: MDPI journal article supplement (doi:10.3390/antibiotics11111664), 2022-11-19
Supplement: s1 [file s1]

## Supplementary data

**Table S1. Antibiotics' plasma concentration measurements.** Data are presented as median {IQR} (min; max)

|                                  | <i>n</i> | Value                      |
|----------------------------------|----------|----------------------------|
|                                  |          | C(mg/L)                    |
| <i>β-lactams</i>                 |          | <i>C<sub>min</sub></i>     |
| <i>Piperacillin (tazobactam)</i> | 41       | 12.3 {4.8–42.2} (1.43;233) |
| <i>Cefepime</i>                  | 22       | 12.6 {7–23.8} (3.3;57.4)   |
| <i>Ceftazidime</i>               | 9        | 41.6 {26.6–52.7} (2.9;60)  |
| <i>Imipenem</i>                  | 9        | 2.1 {1.3–2.2} (0.5;2.7)    |
| <i>Meropenem</i>                 | 8        | 8 {4.6–11.3} (0.03;25.4)   |
| <i>Aminoglycosides</i>           |          | <i>C<sub>max</sub></i>     |
| <i>Amikacin</i>                  | 52       | 71.2 {61.7–95.3} (40;316)  |
| <i>Tobramycin</i>                | 1        | 21.4                       |
| <i>Quinolones</i>                |          | <i>C<sub>max</sub></i>     |
| <i>Ciprofloxacin</i>             | 2        | 5.1 (5.1;5.1)              |

**Table S2. Covariables of  $\beta$ -lactams'  $\log(C_{\min})$  Univariate analysis**

| <i>Variable</i>                          | <i>N</i> | <i>n</i> | <i>Beta (95%CI)</i>   | <i>p</i> |
|------------------------------------------|----------|----------|-----------------------|----------|
| Age                                      | 148      |          | 0.03(0.02; 0.05)      | <0.0001  |
| Weight                                   | 145      |          | 0 (-0.01; 0.01)       | 0.93     |
| Oedema score                             | 94       |          | 0 (-0.06; 0.05)       | 0.89     |
| Fluid intake during D1 (*100mL)          | 139      |          | 0 (-0.02; 0.01)       | 0.85     |
| Creatinine clearance at D1 (mL/min)      | 145      |          | -0.02 (-0.03 ; -0.02) | <0.0001  |
| High renal clearance                     |          |          |                       |          |
| No                                       | 91       |          | 0                     |          |
| Yes (>100mL/min/1.73m <sup>2</sup> )     | 54       |          | -1.4 (-1.8; -0.99)    | <0.0001  |
| PaO <sub>2</sub> /FiO <sub>2</sub> ratio | 146      |          | 0.01 (-0.02; 0.03)    | 0.58     |
| SAPS2 (admission)                        | 146      |          | 0.02 (0.01; 0.03)     | 0.004    |
| SOFA score (day 1)                       | 146      |          | 0.06 (-0.01; 0.12)    | 0.086    |
| Vasopressor                              |          |          |                       |          |
| Yes                                      |          | 63       | 0.19 (-0.25; 0.64)    | 0.39     |
| No                                       |          | 85       | 0                     |          |
| RRT                                      |          |          |                       |          |
| Yes                                      |          | 2        | -0.13 (-2.06; 1.81)   | 0.90     |
| No                                       |          | 135      | 0                     |          |
| Continuous infusion                      |          |          |                       |          |
| Yes                                      |          | 10       | 0                     |          |
| No                                       |          | 138      | -0.73 (-1.61; 0.14)   | 0.10     |

**Table S3. Pharmacokinetic and pharmacodynamic parameters of the patients and comparison according to clinical outcome (clinical cure of VAP).** Data are presented as median {IQR} (min;max) or n (%).

|                        | <i>No cure of VAP</i>       | <i>Cure of VAP</i>            | <i>p</i> |
|------------------------|-----------------------------|-------------------------------|----------|
| $\beta$ -lactams       | <i>n=16</i>                 | <i>n=52</i>                   |          |
| $C_{min}/MIC$          | 15.4 {4.4;61} (0.07;183)    | 11.6 {1.9;49.5} (0.18;637)    | 0.89     |
| $C_{min}/MIC >1$       | 14 (88)                     | 43 (83)                       | 0.94     |
| $C_{min}/MIC >4$       | 12 (75)                     | 35 (67)                       | 0.78     |
| <i>Aminoglycosides</i> | <i>n=9</i>                  | <i>n=34</i>                   |          |
| $C_{max}/MIC$          | 28.6 {17.0;42.5} (0.17;165) | 34.3 {19.6;51.7} (0.26;126.9) | 0.85     |
| $C_{max}/MIC >8$       | 8 (89)                      | 32 (94)                       | 1.00     |
| $C_{max}/MIC >10$      | 8 (89)                      | 30 (88)                       | 1.00     |

**Table S4. Pharmacokinetic and pharmacodynamic parameters of the patients and comparison according to clinical outcome.** Data are presented as median {IQR} (min;max) or n (%).

|                        | <i>Poor clinical outcome</i> | <i>Good clinical outcome</i> | <i>p</i> |
|------------------------|------------------------------|------------------------------|----------|
| $\beta$ -lactams       | <i>n=30</i>                  | <i>n=14</i>                  |          |
| $C_{min}/MIC$          | 19.6 {4.2;67.9} (0.07;637)   | 3.1 {1.2;14.1} (0.18;431.9)  | 0.07     |
| $C_{min}/MIC >1$       | 26 (87)                      | 10 (71)                      | 0.42     |
| $C_{min}/MIC >4$       | 23 (77)                      | 6 (43)                       | 0.06     |
| <i>Aminoglycosides</i> | <i>N=16</i>                  | <i>n=11</i>                  |          |
| $C_{max}/MIC$          | 34.6 {21.6;42.7} (8.2;158)   | 32.3 {11;49.2} (0.17;165)    | 0.22     |
| $C_{max}/MIC >8$       | 16 (100)                     | 9 (81)                       | 0.31     |
| $C_{max}/MIC >10$      | 15 (94)                      | 8 (73)                       | 0.34     |

**Table S5. Pharmacokinetic and pharmacodynamic parameters of the patients and comparison according to clinical outcome (28-day mortality).** Data are presented as median {IQR} (min;max) or n (%).

|                        | <i>Overall population</i>   | <i>Alive at D28</i>        | <i>Death at D28</i>           | <i>p</i> |
|------------------------|-----------------------------|----------------------------|-------------------------------|----------|
| $\beta$ -lactams       | <i>n=77</i>                 | <i>n=49</i>                | <i>n=28</i>                   |          |
| $C_{min}/MIC$          | 12.6 {2.5–47.2} (0.001;637) | 12.6 {2.5 – 47} (0.10;534) | 12.7 {2.6 – 62.3} (0.001;637) | 0.68     |
| $C_{min}/MIC >1$       | 64 (83%)                    | 43 (88)                    | 21 (75)                       | 0.26     |
| $C_{min}/MIC >4$       | 54 (70%)                    | 34 (69)                    | 20 (71)                       | 1.00     |
| <i>Aminoglycosides</i> | <i>n=47</i>                 | <i>n=30</i>                | <i>n=17</i>                   |          |

---

|                    |                                |                                |                                  |      |
|--------------------|--------------------------------|--------------------------------|----------------------------------|------|
| $C_{\max}/MIC$     | 32.5 {19.3–45.5}<br>(0.17;165) | 28.6 {17.0;42.5}<br>(0.17;165) | 34.3 {19.6;51.7}<br>(0.26;126.9) | 0.63 |
| $C_{\max}/MIC >8$  | 44 (94)                        | 28 (93)                        | 16 (94)                          | 1.00 |
| $C_{\max}/MIC >10$ | 41 (87)                        | 25 (83)                        | 16 (94)                          | 0.78 |

---
